# Supplementary material for: Tertiary lymphoid structures critical for prognosis in endometrial cancer patients - a TransPORTEC study
Source: Research Square preprint supplement (doi:10.21203/rs.3.rs-677975/v1), 2021-07-13
Supplement: Supplementary file 2 [file f366b823390176aba326a29a.xlsx]

## Sheet: Table S1.
Gene	mean of normalized counts	log2 Fold Change	Standard Error	Wald statistic	Wald test p-value	Benjamini-Hochberg adjusted p-value
EFCAB1	342.94	-3.37404	0.588509	-5.73321	9.85496e-09	6.28712e-05
FAM198A	100.014	-2.11543	0.366214	-5.77649	7.62766e-09	6.28712e-05
POU3F1	9.30181	2.05366	0.361533	5.68041	1.34369e-08	6.28712e-05
RTL1	35.5429	6.19845	1.09061	5.68349	1.31975e-08	6.28712e-05
GZMH	124.546	2.18279	0.394522	5.53273	3.15281e-08	0.000118016
CD8A	467.671	2.01582	0.367683	5.4825	4.19351e-08	0.00013081
CCDC17	281.419	-2.87784	0.532394	-5.40546	6.46413e-08	0.000146557
KNDC1	77.9246	-2.79908	0.515731	-5.4274	5.71816e-08	0.000146557
LRP2	90.6363	-3.26123	0.605057	-5.38996	7.04752e-08	0.000146557
CD164L2	108.326	-2.3425	0.439764	-5.32673	9.99959e-08	0.000170138
CLEC12A	17.0976	2.19316	0.411215	5.33335	9.64168e-08	0.000170138
CCKBR	69.7914	-3.24381	0.614996	-5.27452	1.33104e-07	0.000180702
CCL5	1679.32	1.95368	0.369558	5.28653	1.24659e-07	0.000180702
LAG3	483.011	2.07637	0.393871	5.2717	1.35169e-07	0.000180702
UNC13A	39.2806	2.29668	0.443826	5.17474	2.28227e-07	0.000284767
FASLG	44.4049	1.87692	0.365475	5.13557	2.81287e-07	0.00030968
FXYD2	102.78	3.07314	0.597664	5.14193	2.71932e-07	0.00030968
ACCN1	121.263	-2.9771	0.586217	-5.07849	3.80439e-07	0.000360532
GPR171	34.8608	1.86923	0.368916	5.06681	4.04529e-07	0.000360532
NKG7	561.3	2.04282	0.401691	5.08555	3.66561e-07	0.000360532
PTCHD1	18.2608	-3.11063	0.613563	-5.06978	3.98284e-07	0.000360532
MIAT	203.485	1.6114	0.321399	5.01372	5.33885e-07	0.00045419
EOMES	29.3233	1.7682	0.357209	4.95003	7.42012e-07	0.000603805
STAC2	101.085	-2.62223	0.534868	-4.90257	9.45916e-07	0.000737657
SCN1A	20.3835	-3.37514	0.690793	-4.88589	1.02963e-06	0.000770821
GNB5	1035.51	-0.929723	0.190776	-4.87337	1.09708e-06	0.000789727
PLG	37.5412	-3.13844	0.647859	-4.84432	1.27044e-06	0.000880651
CCL4L2	250.943	1.71511	0.358595	4.78287	1.7281e-06	0.00104333
KLRK1	115.474	1.7812	0.371569	4.79373	1.63708e-06	0.00104333
NKAIN1	59.6617	2.45352	0.512504	4.78731	1.69027e-06	0.00104333
SLC43A1	1533.15	-1.92588	0.401376	-4.7982	1.60099e-06	0.00104333
PRDM8	32.6844	1.69221	0.35834	4.72234	2.33146e-06	0.00136361
CCR5	202.858	1.46321	0.31074	4.7088	2.49183e-06	0.00141324
STEAP3	1617.6	-1.30322	0.279429	-4.66385	3.10354e-06	0.00170841
CRTAM	26.9943	1.78229	0.385434	4.62412	3.76201e-06	0.00195583
EBF2	2.72969	2.9302	0.633192	4.62767	3.69797e-06	0.00195583
GLI1	92.0575	1.55302	0.337483	4.60179	4.18881e-06	0.0020631
GRIN3B	60.9885	-2.42243	0.526034	-4.60509	4.12292e-06	0.0020631
COL9A3	109.69	-2.16729	0.473449	-4.57767	4.7019e-06	0.00214636
CXCR6	171.784	1.51714	0.331094	4.58221	4.60092e-06	0.00214636
DYDC2	151.41	-3.02859	0.660827	-4.58302	4.58307e-06	0.00214636
BAIAP3	840.005	-1.71131	0.375026	-4.56317	5.03869e-06	0.0022196
PCDH15	2.03372	3.44224	0.754769	4.56065	5.09952e-06	0.0022196
FAM26F	183.745	1.54842	0.340919	4.5419	5.57492e-06	0.00226827
SIAH3	35.562	-2.73613	0.602419	-4.5419	5.57493e-06	0.00226827
SNORA81	5.08568	2.15583	0.474428	4.54406	5.51811e-06	0.00226827
RCAN1	1470.64	-1.48068	0.328228	-4.51113	6.44838e-06	0.00256783
AIM2	41.0104	1.90967	0.425845	4.48442	7.31122e-06	0.00285077
KLRC3	10.0534	2.01556	0.452558	4.45369	8.44051e-06	0.00322393
MAP3K15	7.94431	2.53767	0.570484	4.44827	8.6565e-06	0.0032403
THBS4	493.301	-2.0787	0.469035	-4.43186	9.34235e-06	0.00342846
TMEM155	5.60518	2.1588	0.487855	4.42508	9.64065e-06	0.00346989
C17orf72	407.08	-2.06757	0.469268	-4.40596	1.05318e-05	0.00356215
DNAH10	128.441	-1.8505	0.419825	-4.40779	1.04432e-05	0.00356215
KLRD1	50.4114	1.82435	0.414309	4.40337	1.06583e-05	0.00356215
WDR16	91.8906	-2.58391	0.585488	-4.41325	1.0183e-05	0.00356215
C19orf38	34.3133	1.33039	0.303511	4.38333	1.16878e-05	0.00379818
FOXD2	30.8861	1.40661	0.321012	4.3818	1.17704e-05	0.00379818
LOC121838	84.275	-1.96096	0.449804	-4.35958	1.30313e-05	0.00413379
CCL4	234.68	1.48595	0.341544	4.35069	1.35711e-05	0.00423327
GPR55	28.7143	-2.13779	0.492137	-4.3439	1.39973e-05	0.00429465
NR0B2	23.3918	3.32227	0.766281	4.33557	1.4538e-05	0.00438859
LRRN2	689.514	-1.86037	0.430118	-4.32526	1.52349e-05	0.00445525
ZNF683	117.898	1.6581	0.383083	4.3283	1.50261e-05	0.00445525
SCGB2A2	431.805	-2.88428	0.667396	-4.32169	1.54839e-05	0.00445842
PYHIN1	39.5006	1.65684	0.38439	4.31032	1.63021e-05	0.00462288
C22orf15	78.4754	-2.52004	0.587841	-4.28694	1.8115e-05	0.00497962
C6orf154	124.054	-1.3831	0.322932	-4.28294	1.84436e-05	0.00497962
TARP	34.2436	1.72928	0.403275	4.2881	1.80204e-05	0.00497962
UBASH3A	48.2091	1.51065	0.352892	4.28078	1.86243e-05	0.00497962
CCDC108	234.963	-2.16588	0.506741	-4.27414	1.91877e-05	0.00498774
MRC1	141.752	1.42169	0.332522	4.27548	1.90726e-05	0.00498774
CD3E	594.21	1.48701	0.34878	4.26347	2.01277e-05	0.00516041
CD96	172.586	1.27202	0.299219	4.25115	2.12678e-05	0.00537024
SLA2	90.455	1.36153	0.320472	4.24851	2.152e-05	0.00537024
TRAT1	20.9565	1.79037	0.421893	4.24365	2.19911e-05	0.0054156
LRRC56	340.506	-1.10048	0.259693	-4.23762	2.259e-05	0.00549084
DLEC1	222.553	-2.24773	0.531243	-4.23107	2.3258e-05	0.00558072
PCDH10	40.0453	-2.41685	0.572331	-4.22282	2.41261e-05	0.0056443
PDCD1	158.268	1.68297	0.39844	4.22388	2.40128e-05	0.0056443
APOBEC3H	23.7727	1.2781	0.305332	4.18594	2.83989e-05	0.00580465
CCDC42B	378.342	-2.04136	0.485858	-4.20155	2.65089e-05	0.00580465
CD7	511.63	1.50226	0.360202	4.17061	3.03784e-05	0.00580465
FAM66D	73.1999	-1.95875	0.468773	-4.17846	2.93494e-05	0.00580465
GRIP2	13.9971	1.76088	0.41859	4.2067	2.5913e-05	0.00580465
GRK5	149.522	0.782334	0.187588	4.17049	3.03941e-05	0.00580465
GZMB	395.461	1.70139	0.40791	4.17099	3.0328e-05	0.00580465
HHAT	203.672	-0.975046	0.233135	-4.18233	2.88538e-05	0.00580465
HRNR	13.1794	-2.2461	0.535221	-4.19658	2.70974e-05	0.00580465
IL17REL	2.3949	2.40315	0.573272	4.192	2.76505e-05	0.00580465
KCNJ10	37.5872	1.63523	0.390712	4.18527	2.8483e-05	0.00580465
NCRNA00158	2.42994	2.11281	0.506343	4.17268	3.01042e-05	0.00580465
NHLRC4	149.85	-1.53053	0.366658	-4.17426	2.98954e-05	0.00580465
RELN	31.1977	-2.42227	0.575459	-4.20928	2.56188e-05	0.00580465
SIRPG	109.493	1.66896	0.398177	4.19149	2.77129e-05	0.00580465
SPRR1A	56.553	-3.51957	0.840435	-4.1878	2.81676e-05	0.00580465
TMEM61	53.6908	-1.77243	0.423944	-4.18081	2.90466e-05	0.00580465
TUBA3E	71.8518	-2.82207	0.671985	-4.19961	2.67377e-05	0.00580465
TBX21	42.6133	1.52963	0.367187	4.1658	3.10262e-05	0.00586552
PRIMA1	116.99	-1.82898	0.440401	-4.153	3.28149e-05	0.00614164
HAVCR2	282.48	1.21542	0.292969	4.14865	3.34445e-05	0.0061975
ANKRD45	74.3455	-1.86298	0.449744	-4.14231	3.43818e-05	0.00625327
KCTD19	4.32357	2.00939	0.485113	4.1421	3.44137e-05	0.00625327
LILRB5	52.8628	1.44368	0.349097	4.13547	3.54232e-05	0.00625453
MSMB	12.4402	-3.29172	0.795801	-4.13636	3.52858e-05	0.00625453
THSD7B	37.534	-1.89576	0.458147	-4.13789	3.50514e-05	0.00625453
CD2	451.839	1.4601	0.353624	4.12898	3.64381e-05	0.00637359
APOD	520.731	-2.09681	0.509699	-4.11383	3.89154e-05	0.00668202
CD209	65.6314	1.34574	0.327048	4.11481	3.87497e-05	0.00668202
SLAMF7	420.607	1.65041	0.402021	4.10529	4.03812e-05	0.00687069
GPX3	6208.8	-1.66018	0.404959	-4.09962	4.13825e-05	0.00695573
TIMP4	4.9655	-1.98771	0.485012	-4.09827	4.16244e-05	0.00695573
CCDC39	51.4413	-2.03133	0.496	-4.09543	4.21392e-05	0.00697945
CST7	240.093	1.47164	0.359769	4.0905	4.30439e-05	0.00706676
ANKMY1	541.689	-0.954747	0.234536	-4.07079	4.68546e-05	0.00733675
C2orf85	3.25388	2.39699	0.588632	4.07214	4.65825e-05	0.00733675
CTSW	231.1	1.61966	0.397795	4.07159	4.66934e-05	0.00733675
FABP1	7.68483	-6.39082	1.56737	-4.07742	4.55373e-05	0.00733675
GBP4	1166.43	1.25626	0.308051	4.07808	4.54089e-05	0.00733675
TMEM190	136.483	-2.78332	0.683886	-4.06986	4.70405e-05	0.00733675
IGFBP1	12.1431	-2.9866	0.734327	-4.06712	4.75979e-05	0.00736233
C1orf87	51.7124	-3.80883	0.937178	-4.06415	4.82073e-05	0.00739548
LOC84740	234.145	-2.7411	0.675813	-4.05601	4.99179e-05	0.00753438
TOX2	129.764	1.26417	0.311595	4.05709	4.96886e-05	0.00753438
DNER	51.4286	-1.92259	0.475582	-4.04262	5.28583e-05	0.00773671
GBP5	811.575	1.59141	0.393853	4.04063	5.33084e-05	0.00773671
IFT122	1480.07	-0.745984	0.184624	-4.04055	5.33253e-05	0.00773671
SLAMF6	105.09	1.50255	0.371517	4.04437	5.24637e-05	0.00773671
SLC26A7	167.534	-2.01434	0.498025	-4.04466	5.23983e-05	0.00773671
CD244	30.6468	1.41689	0.351625	4.02956	5.58814e-05	0.00786373
FAM181A	144.387	-1.97665	0.490363	-4.03099	5.55415e-05	0.00786373
FAM78A	183.824	0.985759	0.244359	4.03407	5.48191e-05	0.00786373
RSPH9	47.981	-2.13234	0.528911	-4.03155	5.54093e-05	0.00786373
GFI1	53.7324	1.1661	0.289557	4.0272	5.64441e-05	0.00788365
GZMA	299.363	1.54924	0.385518	4.0186	5.85454e-05	0.00799807
ITK	88.9083	1.27697	0.317764	4.0186	5.85442e-05	0.00799807
TCTN2	850.618	-0.676022	0.16815	-4.02034	5.81144e-05	0.00799807
IFNG	29.5381	2.02232	0.504627	4.00756	6.13496e-05	0.00832042
ADAMTS8	558.117	-2.21177	0.552747	-4.00142	6.29634e-05	0.00843043
ICOS	37.9424	1.30625	0.326646	3.99898	6.36167e-05	0.00843043
SLA	320.005	1.09016	0.272698	3.99769	6.39624e-05	0.00843043
UPB1	3.86041	1.53303	0.383295	3.9996	6.34495e-05	0.00843043
HCST	273.871	1.31106	0.32937	3.98051	6.87666e-05	0.00893775
SPATA4	6.97111	-2.43701	0.612211	-3.98068	6.87198e-05	0.00893775
SNORA52	2.86879	1.77524	0.446349	3.97725	6.97157e-05	0.00899861
GFPT2	193.423	-1.54244	0.388392	-3.97134	7.14701e-05	0.00904717
NPC1L1	34.304	-2.09622	0.527868	-3.9711	7.15421e-05	0.00904717
RRAD	439.865	-1.95306	0.491684	-3.97218	7.12182e-05	0.00904717
CCDC102B	27.054	0.838135	0.211816	3.95691	7.59264e-05	0.00953718
CD3G	32.1421	1.41899	0.35884	3.95438	7.67339e-05	0.00957435
RTN4RL2	124.862	-1.75383	0.443784	-3.95199	7.75036e-05	0.00960634
PRF1	400.287	1.50673	0.381706	3.94735	7.9022e-05	0.0097301
CD200R1	13.954	1.24614	0.316737	3.93431	8.34367e-05	0.0101909
SLC27A6	87.9991	-1.79279	0.455819	-3.93311	8.38529e-05	0.0101909
CELF5	38.5115	1.56465	0.398405	3.92727	8.59145e-05	0.010374
CXCR3	183.006	1.46069	0.372796	3.91819	8.92146e-05	0.0105587
LCP2	346.373	1.01402	0.258856	3.91731	8.95423e-05	0.0105587
MMP3	98.2156	-1.94209	0.495924	-3.91611	8.99877e-05	0.0105587
SLC26A2	3479.88	-1.19607	0.30548	-3.91537	9.02649e-05	0.0105587
TUBA3D	94.7099	-2.45703	0.627105	-3.91805	8.9269e-05	0.0105587
PSTPIP1	179.44	1.33646	0.341912	3.9088	9.27551e-05	0.010777
SFTPD	35.8627	-1.72581	0.441675	-3.90743	9.32825e-05	0.010777
SLC45A3	207.754	-0.994406	0.254948	-3.90042	9.60268e-05	0.011026
C16orf54	67.5768	1.30194	0.334108	3.89676	9.74871e-05	0.0110837
GATA4	9.79228	-3.10396	0.797318	-3.893	9.90125e-05	0.0110837
PTPN7	324.593	1.2681	0.325729	3.8931	9.89705e-05	0.0110837
SPEF1	265.988	-1.70005	0.436824	-3.89183	9.94903e-05	0.0110837
TIGIT	136.748	1.38494	0.355622	3.89441	9.84363e-05	0.0110837
DMBT1	425.612	-2.28548	0.588402	-3.88422	0.00010266	0.0113023
SCGB1A1	180.506	-3.16152	0.813697	-3.88538	0.000102171	0.0113023
NTRK2	349.612	-1.85463	0.477947	-3.88041	0.000104279	0.0114134
BIN2	156.28	1.15043	0.297129	3.87182	0.000108024	0.0114593
CCDC103	334.683	-1.01344	0.261482	-3.87575	0.000106298	0.0114593
CDC25B	1984.9	0.787581	0.203455	3.87104	0.000108373	0.0114593
LOC100188949	10.5018	1.54819	0.399704	3.87333	0.000107359	0.0114593
SNX10	282.636	1.08013	0.278729	3.87518	0.000106548	0.0114593
WDR66	408.999	-1.34456	0.346808	-3.87695	0.000105775	0.0114593
LRRC46	696.515	-1.77385	0.458728	-3.86688	0.000110235	0.0115908
C1orf65	1.69092	-2.70023	0.699635	-3.85948	0.00011363	0.0117497
CD247	168.938	1.2462	0.322849	3.86001	0.000113382	0.0117497
SUMO1P1	1.29499	2.44265	0.632763	3.86029	0.000113252	0.0117497
CDHR2	51.416	-2.42129	0.628643	-3.85162	0.000117338	0.0119081
PTPN22	88.7237	1.25919	0.326799	3.85311	0.000116626	0.0119081
RNU11	5.36618	2.19544	0.570312	3.84953	0.000118343	0.0119081
STX11	80.2031	1.00399	0.260766	3.85017	0.000118036	0.0119081
TACR1	72.7969	-1.88536	0.489419	-3.85224	0.000117044	0.0119081
CXCL9	1467.83	1.68639	0.438506	3.84576	0.000120179	0.0119392
FABP6	107.862	-1.97786	0.51426	-3.84604	0.000120042	0.0119392
PTPRT	9.53587	-2.79335	0.726494	-3.84497	0.000120566	0.0119392
C21orf121	89.1837	-2.83966	0.740773	-3.83337	0.000126399	0.0122303
LTF	18960.1	-2.90708	0.758679	-3.83177	0.000127226	0.0122303
MAP4K1	216.588	1.21461	0.316984	3.83175	0.000127234	0.0122303
MYO7A	271.851	0.976578	0.254889	3.83138	0.000127426	0.0122303
SLAMF8	432.406	1.15143	0.300497	3.83176	0.000127232	0.0122303
SLC11A2	2843.88	-0.675283	0.17619	-3.83269	0.000126751	0.0122303
ZCCHC12	96.3613	-1.78415	0.46583	-3.83003	0.000128125	0.0122347
C9orf24	595.831	-2.3175	0.60771	-3.8135	0.000137013	0.0124566
C9orf9	378.42	-1.01727	0.26624	-3.82087	0.000132984	0.0124566
CCDC89	24.7794	-1.54798	0.405282	-3.81952	0.000133713	0.0124566
CD3D	296.924	1.45249	0.380162	3.82072	0.000133064	0.0124566
CPNE6	4.98153	-2.76601	0.72431	-3.81881	0.000134096	0.0124566
GFAP	13.5308	-2.30608	0.603178	-3.82322	0.00013172	0.0124566
KIAA0802	335.013	-1.65697	0.434521	-3.81334	0.000137104	0.0124566
OGN	51.3966	-2.39075	0.626908	-3.81356	0.00013698	0.0124566
SCTR	28.7765	-2.37351	0.622237	-3.81448	0.00013647	0.0124566
TPPP3	3383.76	-1.86482	0.489026	-3.81333	0.000137105	0.0124566
IL12RB1	78.6907	1.2365	0.324504	3.81042	0.00013873	0.0125433
CCDC78	737.534	-1.92555	0.506099	-3.80469	0.000141983	0.0126541
LOC222699	39.4317	-0.927315	0.243621	-3.80639	0.000141013	0.0126541
TRH	25.2518	-2.64381	0.694756	-3.80538	0.000141586	0.0126541
C15orf62	146.399	-1.1356	0.298945	-3.7987	0.00014546	0.0127813
CCDC147	32.474	-1.82762	0.480975	-3.79982	0.000144801	0.0127813
TTBK1	17.2048	1.28002	0.336909	3.79929	0.000145109	0.0127813
CCDC74B	338.355	-1.22604	0.323574	-3.78906	0.000151216	0.0128062
DNAH2	214.049	-1.74365	0.460141	-3.78939	0.00015102	0.0128062
PP14571	25.2423	-1.65586	0.436135	-3.79668	0.000146645	0.0128062
SPN	218.354	1.16007	0.306067	3.79025	0.000150497	0.0128062
SRCRB4D	92.4142	-1.23379	0.325077	-3.79539	0.000147414	0.0128062
SUSD2	910.177	-1.4084	0.371563	-3.79049	0.000150351	0.0128062
TRPV4	335.97	-0.975102	0.2572	-3.79122	0.000149909	0.0128062
UCN3	3.89701	-4.17629	1.10176	-3.79055	0.000150314	0.0128062
GPR174	9.45012	1.51029	0.399352	3.78184	0.000155671	0.0129581
LRRC18	35.7058	-2.67893	0.708329	-3.78204	0.000155549	0.0129581
MYBPC2	80.5	-1.89354	0.500715	-3.78167	0.00015578	0.0129581
SLC13A5	22.1647	-2.27483	0.601178	-3.78396	0.000154352	0.0129581
SP140	112.25	1.25211	0.331201	3.78051	0.000156505	0.0129608
PCDHGB5	104.981	-2.07468	0.549083	-3.77845	0.000157809	0.0130112
GZMM	67.6712	1.46199	0.387173	3.77605	0.000159335	0.0130223
PDLIM1	7514.98	-0.778497	0.206155	-3.77628	0.000159191	0.0130223
AKAP5	106.033	0.948985	0.25153	3.77285	0.000161396	0.0131334
FAM188B	395.075	-0.743173	0.197071	-3.77108	0.000162539	0.0131692
TTC24	6.88879	1.6338	0.433893	3.76544	0.000166255	0.0134122
IL10RA	373.707	1.05018	0.279197	3.76144	0.000168939	0.0135502
SPEG	218.004	-1.50324	0.39972	-3.76074	0.000169414	0.0135502
SLC7A4	94.7874	-2.09868	0.558254	-3.75937	0.000170345	0.0135667
LOC100129534	81.3286	-0.990836	0.263719	-3.75717	0.000171846	0.0136283
B9D2	402.478	-0.776936	0.207117	-3.75119	0.000175999	0.013668
DDR1	7021.77	-0.620682	0.165297	-3.75495	0.000173373	0.013668
NLRC3	139.04	0.82561	0.220071	3.75156	0.000175736	0.013668
OVGP1	2738.96	-2.43467	0.648855	-3.75225	0.000175257	0.013668
RGS9	17.055	1.3074	0.348315	3.75351	0.000174374	0.013668
ZMYND10	1160.5	-1.72297	0.459512	-3.74956	0.000177144	0.0137001
SFRP4	2313.55	-1.85546	0.495141	-3.74734	0.000178716	0.0137648
SH2D1A	67.0513	1.44797	0.386505	3.7463	0.000179459	0.0137654
CHRNA3	44.1992	1.67352	0.447243	3.74186	0.000182663	0.0138619
GABRB3	46.7	-1.97683	0.528354	-3.74148	0.00018294	0.0138619
PDZD4	71.8931	1.44825	0.386884	3.74338	0.000181563	0.0138619
ZNF831	28.0348	1.34358	0.359233	3.74012	0.000183929	0.0138807
BCL11B	89.3598	1.22092	0.327208	3.73132	0.000190476	0.0142598
LRRC10B	266.835	-1.91975	0.514421	-3.73187	0.000190061	0.0142598
PLCXD3	20.2881	-2.39677	0.642569	-3.72998	0.000191496	0.014279
SERPINA3	8187.89	-2.26967	0.609045	-3.7266	0.000194079	0.0144142
ARHGAP9	264.695	1.13104	0.30402	3.72027	0.00019901	0.0146641
FCER1G	705.274	1.03509	0.278201	3.72065	0.000198711	0.0146641
ATP2B3	9.36336	-2.73675	0.73602	-3.71831	0.000200557	0.0147201
CCL3L1	62.5432	1.46497	0.394255	3.7158	0.000202565	0.0147731
THEMIS	28.5018	1.42803	0.384352	3.71543	0.000202858	0.0147731
ACSBG1	19.2832	-1.39374	0.376119	-3.70557	0.000210912	0.0149766
GBX2	3.58853	2.34566	0.632819	3.70668	0.000209993	0.0149766
GIMAP5	334.848	1.11521	0.301307	3.70125	0.000214538	0.0149766
HS6ST1	4896.74	-0.795208	0.214453	-3.70807	0.000208847	0.0149766
KIAA1409	31.6433	-1.34178	0.362603	-3.70041	0.000215255	0.0149766
MUC4	1815.95	-2.30312	0.621866	-3.70356	0.000212597	0.0149766
PCDHA11	32.8626	-2.6208	0.70626	-3.71082	0.000206588	0.0149766
RADIL	57.8812	-1.38329	0.373333	-3.70523	0.000211196	0.0149766
RASAL3	278.992	1.1048	0.298483	3.70139	0.000214423	0.0149766
SEPT1	309.152	1.04098	0.281165	3.70239	0.00021358	0.0149766
TRAF3IP3	137.401	1.0922	0.294567	3.70783	0.000209047	0.0149766
TTC21A	327.675	-1.16791	0.315236	-3.70487	0.000211496	0.0149766
CCDC74A	577.309	-1.12849	0.305113	-3.69858	0.000216807	0.0150288
DNAH3	151.316	-1.73603	0.470411	-3.69044	0.000223862	0.0153017
FCGR1A	240.137	1.17422	0.318183	3.69039	0.000223915	0.0153017
HTR3A	42.9389	-2.32925	0.631187	-3.69027	0.000224016	0.0153017
VWA5B1	5.79868	-2.50463	0.678609	-3.69083	0.000223527	0.0153017
CXorf57	20.5089	2.11136	0.5724	3.68861	0.000225479	0.015338
EVI2B	224.193	1.1512	0.312164	3.68782	0.000226185	0.015338
GAL3ST3	13.5549	-2.42218	0.658094	-3.6806	0.000232682	0.0156088
PAEP	60.3544	-2.58485	0.702132	-3.68142	0.000231934	0.0156088
RASD1	2824.34	-1.46522	0.39803	-3.68117	0.000232165	0.0156088
CD101	114.63	0.751045	0.204309	3.67602	0.000236902	0.0157229
GLP1R	3.41323	-3.29695	0.896776	-3.67644	0.000236507	0.0157229
TMEM231	1088.5	-0.992412	0.269914	-3.67677	0.000236206	0.0157229
MARCO	131.541	1.81209	0.493672	3.67063	0.00024195	0.0160012
TFF2	32.7501	2.74897	0.749251	3.66896	0.000243537	0.0160494
CALCA	66.2503	-3.11973	0.850596	-3.6677	0.000244742	0.0160723
FCGR1C	121.553	1.20024	0.327513	3.66472	0.000247608	0.0162036
RGL4	21.426	1.08325	0.295663	3.6638	0.000248501	0.0162054
C1QL1	111.036	-2.0847	0.569711	-3.65922	0.000252985	0.0164336
FYB	265.076	1.19567	0.326825	3.65844	0.000253756	0.0164336
FAM47E	130.417	-1.2592	0.34443	-3.65589	0.000256287	0.0165402
LOC441869	674.996	-1.57205	0.430752	-3.64954	0.000262707	0.0168963
WDR38	324.851	-2.43501	0.667639	-3.6472	0.000265113	0.0169926
SLFN12L	8.33622	1.23859	0.339724	3.64587	0.000266486	0.0170224
LOC606724	159.144	1.19877	0.328886	3.64493	0.000267463	0.0170267
GZMK	149.288	1.54178	0.423139	3.64368	0.000268769	0.0170518
ENOX1	35.5175	1.30705	0.359081	3.63999	0.000272649	0.0172142
LOC645323	159.148	-1.69273	0.465101	-3.6395	0.000273168	0.0172142
C2orf62	110.374	-2.0045	0.55146	-3.6349	0.000278089	0.017413
TMEM132A	6637.81	-0.738124	0.203071	-3.63481	0.000278183	0.017413
TCTE1	42.8781	-2.18778	0.60221	-3.63292	0.000280236	0.017483
GVIN1	54.6867	1.15761	0.318777	3.63143	0.000281855	0.0175256
C10orf95	148.301	-1.43985	0.39682	-3.62848	0.000285095	0.0176683
ARHGAP15	85.5228	1.07296	0.296091	3.62375	0.000290363	0.0178178
MFSD6L	126.587	-1.21446	0.335063	-3.62458	0.000289429	0.0178178
P2RY2	153.95	-1.14583	0.316175	-3.62403	0.000290046	0.0178178
CDC42EP4	2010.93	-0.608666	0.168011	-3.62277	0.000291469	0.0178272
C11orf16	87.189	-2.02491	0.559704	-3.61782	0.000297098	0.0180369
ITGAE	513.064	0.518127	0.143215	3.61782	0.0002971	0.0180369
PIK3C2G	41.2929	-2.83495	0.783738	-3.61722	0.000297788	0.0180369
CACNB3	1118.38	-0.609365	0.168544	-3.61547	0.000299802	0.0181003
DCDC2B	27.4472	-2.50145	0.692487	-3.61226	0.000303536	0.0182668
DNAJC12	60.0826	-1.41231	0.391216	-3.61006	0.00030613	0.0183639
F2RL2	95.627	1.29401	0.359257	3.6019	0.0003159	0.0188894
CNGA4	85.1764	-1.98856	0.552243	-3.60088	0.000317138	0.018903
CAPN13	1236.65	-1.85211	0.515187	-3.59502	0.00032437	0.0189083
CCDC157	220.771	-0.892879	0.248501	-3.59306	0.000326821	0.0189083
CD52	476.481	1.22416	0.340381	3.59644	0.000322603	0.0189083
FOXE3	4.46365	1.90772	0.531005	3.59265	0.000327328	0.0189083
HPS5	431.467	0.427011	0.118651	3.59888	0.000319596	0.0189083
KIF6	58.4735	-1.33529	0.371612	-3.59323	0.000326604	0.0189083
RGS1	768.669	1.16265	0.32357	3.59319	0.00032666	0.0189083
TEKT3	37.1421	-1.6986	0.472386	-3.5958	0.000323401	0.0189083
TXNDC6	66.9289	-1.6809	0.467662	-3.59426	0.000325317	0.0189083
ZNF677	24.4844	-1.41689	0.393925	-3.59687	0.000322074	0.0189083
RAB36	931.615	-1.03204	0.287352	-3.59155	0.00032872	0.0189302
ARMC4	89.1297	-1.78513	0.497214	-3.59026	0.000330351	0.0189658
LRRC61	1279.74	-0.71444	0.19933	-3.5842	0.000338112	0.019352
CD27	305.388	1.35975	0.379963	3.57863	0.000345393	0.0197085
KCNK9	8.46982	-1.94219	0.542914	-3.57734	0.000347103	0.0197458
TEKT2	505.224	-1.51235	0.422962	-3.57561	0.000349414	0.0198171
WDR93	73.6854	-1.30061	0.363921	-3.57387	0.000351747	0.0198891
OSTalpha	95.2214	-1.19606	0.33511	-3.56916	0.000358123	0.0201886
RIBC1	280.342	-1.18048	0.330831	-3.56823	0.000359399	0.0201997
UMODL1	30.4479	-1.88596	0.528716	-3.56706	0.00036101	0.0202296
LRTOMT	597.157	-0.691674	0.194125	-3.56304	0.000366582	0.0204804
LRRC8C	238.019	0.693945	0.194824	3.5619	0.000368174	0.0205082
C9orf117	263.958	-1.54468	0.434324	-3.55651	0.000375811	0.0208714
MMP26	239.936	-3.39511	0.95567	-3.5526	0.000381445	0.0210594
STK32A	13.837	-2.24645	0.632301	-3.55282	0.000381121	0.0210594
IL2RG	889.75	1.20644	0.339756	3.55089	0.000383931	0.0211239
SULT1C4	89.9552	-1.36168	0.383545	-3.55025	0.000384871	0.0211239
CHD5	7.06051	1.71163	0.482378	3.54831	0.00038771	0.0211405
FCGR1B	169.539	1.13478	0.319862	3.54773	0.000388562	0.0211405
LAX1	35.7587	1.29152	0.363896	3.54913	0.000386502	0.0211405
LACTB	276.429	0.485266	0.137141	3.53843	0.000402513	0.021836
C17orf87	20.9987	1.05302	0.298174	3.53155	0.000413129	0.0221551
MORN1	129.508	-0.924185	0.261629	-3.53243	0.000411756	0.0221551
SLC5A8	1.72089	-3.42795	0.970603	-3.53178	0.00041278	0.0221551
TBX15	102.882	-1.57681	0.446428	-3.53204	0.00041236	0.0221551
PLIN3	2857.68	-0.561285	0.159137	-3.52706	0.000420196	0.0224697
SNORA34	0.963247	1.79493	0.509372	3.5238	0.000425401	0.0226832
GIMAP4	429.85	0.943276	0.267955	3.52027	0.000431103	0.0227924
LILRB4	370.028	1.22418	0.347605	3.52175	0.000428705	0.0227924
SP9	15.0016	-2.83949	0.806578	-3.52042	0.000430871	0.0227924
DENND1C	333.946	0.678177	0.192767	3.51812	0.000434614	0.0229133
MDH1B	122.275	-1.17586	0.334535	-3.51491	0.000439905	0.0231271
PACRG	111.832	-1.69436	0.482429	-3.51215	0.000444505	0.0233035
SFTPB	14.7978	-2.0132	0.574069	-3.5069	0.000453355	0.0237011
C8orf48	9.8383	-1.56948	0.44879	-3.49713	0.000470293	0.0245181
CPNE2	2618.11	-0.731919	0.209483	-3.49394	0.000475953	0.0246757
LY9	50.0662	1.31537	0.376402	3.49459	0.000474794	0.0246757
CCDC19	621.172	-1.5768	0.45169	-3.49089	0.00048141	0.0248211
MAMSTR	66.2483	1.08806	0.311646	3.49133	0.000480624	0.0248211
F11R	7166.65	-0.515942	0.147923	-3.4879	0.000486832	0.0248403
FAM23A	10.708	1.48241	0.425033	3.48776	0.000487091	0.0248403
IRF4	116.699	1.42024	0.407187	3.48793	0.000486769	0.0248403
TRIM55	58.099	-2.36106	0.676944	-3.48782	0.000486972	0.0248403
C17orf98	1.73212	2.00518	0.575657	3.48329	0.000495284	0.0251895
FAM150B	249.931	-1.74303	0.502021	-3.47203	0.000516542	0.0261995
ITGAL	546.154	1.09821	0.316376	3.47121	0.000518113	0.0262081
C2orf40	54.0065	-2.23592	0.644958	-3.46678	0.000526738	0.0265726
FBXO17	148.156	1.39931	0.404338	3.46074	0.000538684	0.0269572
GAS2L2	174.711	-2.10062	0.60697	-3.46083	0.000538504	0.0269572
WFIKKN2	7.06905	-1.80825	0.522308	-3.46204	0.000536106	0.0269572
FAM166B	313.955	-1.9195	0.554955	-3.45883	0.000542523	0.0269682
LOC100128292	39.3088	-0.826938	0.239104	-3.45848	0.000543225	0.0269682
PDLIM4	925.366	-1.12299	0.324661	-3.45896	0.000542264	0.0269682
C1orf88	905.603	-1.54375	0.446875	-3.45453	0.000551251	0.0272222
RTDR1	55.7624	-1.4308	0.414111	-3.45511	0.00055006	0.0272222
C2	907.717	1.09612	0.317515	3.45217	0.00055609	0.0272797
FRG2	8.55764	-2.70033	0.782367	-3.45149	0.000557507	0.0272797
LOC100130933	326.023	-1.63786	0.474445	-3.45217	0.000556108	0.0272797
PARP15	15.2549	1.22868	0.356023	3.45113	0.000558245	0.0272797
KBTBD8	31.6641	0.808421	0.23435	3.44963	0.00056135	0.02736
CCL3	212.324	1.18661	0.344102	3.44842	0.000563885	0.0273762
TTC30B	189.076	-0.920575	0.266983	-3.44807	0.00056461	0.0273762
RARA	1968.53	-0.568899	0.165096	-3.44586	0.00056925	0.0275299
SH2D2A	190.69	0.984994	0.285917	3.44503	0.000570999	0.0275433
SHC2	497.804	-1.30476	0.378921	-3.44335	0.000574548	0.0276433
IL2RB	589.915	1.04819	0.304778	3.43919	0.000583463	0.0280002
C1QA	3290.47	1.28616	0.374327	3.43592	0.000590555	0.0282249
C2orf50	65.8976	-1.55776	0.453425	-3.43553	0.000591394	0.0282249
DLEU2	56.0547	0.719147	0.209466	3.43324	0.000596423	0.0282249
MMP12	384.262	1.51402	0.441035	3.43289	0.000597193	0.0282249
TTC25	232.735	-1.44078	0.419524	-3.43432	0.000594035	0.0282249
TTC29	63.9098	-2.43499	0.709291	-3.43299	0.000596971	0.0282249
ANGPT4	1.42411	-2.69062	0.785405	-3.42577	0.000613066	0.0286394
CNTN5	10.3412	-2.26912	0.662141	-3.42695	0.000610403	0.0286394
SAMD3	33.2855	1.14105	0.333101	3.42552	0.000613615	0.0286394
SAT1	20957.1	-0.761523	0.222239	-3.42659	0.000611212	0.0286394
STOX1	224.061	-0.952579	0.278072	-3.42565	0.000613324	0.0286394
LPXN	317.592	0.653177	0.190831	3.42281	0.000619778	0.0288552
ANKRD58	36.5698	0.962356	0.281258	3.42161	0.000622512	0.0289105
LHX5	0.972703	-2.78254	0.813675	-3.41972	0.000626855	0.0289685
TSNAXIP1	233.461	-1.2304	0.359793	-3.41973	0.000626832	0.0289685
GLIS1	18.3269	-1.08464	0.317438	-3.41685	0.000633509	0.0292038
TLR8	37.3408	1.33431	0.390741	3.41482	0.00063825	0.0293501
USP15	717.744	0.353119	0.103434	3.41395	0.000640282	0.0293713
C1orf173	279.171	-1.83736	0.539099	-3.4082	0.000653932	0.029855
FCGR3A	1012.56	1.07312	0.314929	3.4075	0.000655609	0.029855
GPR65	58.2613	0.980166	0.287629	3.40775	0.000655011	0.029855
FCRL3	22.7718	1.38866	0.407839	3.40492	0.000661831	0.0299923
IL27	5.18748	1.30612	0.383538	3.40545	0.000660562	0.0299923
CCDC113	712.146	-0.973861	0.28649	-3.39929	0.000675614	0.030543
C11orf41	73.2953	-1.6813	0.495084	-3.39598	0.000683829	0.0307075
LYZ	2913.91	1.32806	0.39108	3.39588	0.000684091	0.0307075
NXPH3	61.5199	-1.27116	0.374329	-3.39584	0.000684175	0.0307075
ADAMTSL4	193.831	1.04663	0.308385	3.39391	0.000689022	0.030828
VWA3B	170.437	-1.67555	0.493758	-3.39346	0.000690154	0.030828
CYTIP	191.025	0.987142	0.2912	3.38991	0.000699155	0.0311452
SERPINA11	43.2007	-2.89448	0.853993	-3.38935	0.000700584	0.0311452
MAMDC2	33.1967	-1.64838	0.486836	-3.3859	0.000709451	0.0314647
GNG2	219.916	0.86868	0.25677	3.38311	0.000716692	0.0317107
ZNF883	33.3254	-1.63237	0.482821	-3.3809	0.000722491	0.0318919
SNORA48	7.05191	1.76644	0.522859	3.37842	0.000729032	0.0321048
LOC400891	53.7582	-2.09996	0.621951	-3.37641	0.000734397	0.0322652
APOL3	481.941	1.06089	0.31441	3.37422	0.000740261	0.0324467
KIAA0922	389.554	0.545051	0.161675	3.37126	0.000748242	0.0327199
APOBEC3G	418.305	1.02052	0.302816	3.37008	0.000751456	0.0327838
KCNRG	105.346	-1.25159	0.371692	-3.36728	0.000759146	0.0329656
RBM28	526.429	0.361202	0.107251	3.36783	0.000757617	0.0329656
SLC10A4	38.4281	-1.56239	0.464248	-3.36542	0.000764273	0.0331114
KLRC2	15.9776	1.44392	0.429432	3.36239	0.000772701	0.0333281
MEOX2	14.252	2.10903	0.627249	3.36234	0.000772836	0.0333281
SLC39A6	2467.31	-0.556777	0.165687	-3.36042	0.000778242	0.0334841
VWA3A	324.66	-1.92369	0.57259	-3.35964	0.000780445	0.0335019
PCYT1B	141.895	-1.42677	0.4248	-3.35868	0.000783145	0.0335408
C14orf86	13.6615	-1.58154	0.471366	-3.35522	0.000793012	0.0338859
CD6	278.388	1.17305	0.349822	3.35328	0.000798601	0.0339696
IGSF3	1025.84	-0.843574	0.251539	-3.35365	0.000797527	0.0339696
CLDN2	85.9955	-1.94554	0.580414	-3.35199	0.00080232	0.0339971
SIGLEC10	174.162	1.07198	0.319824	3.3518	0.00080288	0.0339971
UCKL1AS	59.0862	-1.23694	0.369137	-3.3509	0.000805499	0.034031
CALCB	18.3086	-2.0782	0.620359	-3.35	0.000808126	0.0340651
FBLN5	1159.02	-0.958873	0.286341	-3.34871	0.000811877	0.0341463
SLC46A2	48.9965	-1.76678	0.527728	-3.3479	0.000814261	0.0341697
COL2A1	910.681	-2.37331	0.709371	-3.34566	0.000820884	0.0343631
P2RY8	85.078	1.13346	0.338844	3.3451	0.000822541	0.0343631
ATP1A3	42.7405	1.58068	0.472687	3.34402	0.000825734	0.0344142
LETM2	120.805	-0.760324	0.227407	-3.34345	0.000827441	0.0344142
C5orf49	480.562	-1.79913	0.538333	-3.34204	0.000831642	0.0344359
ZNF80	5.76554	1.5997	0.478631	3.34224	0.000831039	0.0344359
ARHGAP30	414.228	0.817818	0.244846	3.34013	0.000837395	0.0345734
GRIK4	28.5787	-1.92176	0.575426	-3.33971	0.000838657	0.0345734
ELP3	3317.08	-0.84467	0.252985	-3.33881	0.000841389	0.0346097
SLCO4A1	554.667	1.49226	0.447225	3.33671	0.000847758	0.0347952
PTPRU	1593.41	-0.948338	0.284569	-3.33255	0.000860555	0.0352432
C5orf58	2.70472	1.25196	0.375962	3.33002	0.000868394	0.0354866
KIR3DL2	4.54491	1.84888	0.555725	3.32698	0.00087794	0.035752
TNFSF4	59.4115	0.88596	0.266315	3.32673	0.000878709	0.035752
CTLA4	67.9853	1.17135	0.352455	3.32341	0.000889236	0.0361018
GPR87	22.0466	-1.79363	0.540044	-3.32127	0.000896098	0.0362767
PTGFRN	4097.5	-0.488794	0.147189	-3.32086	0.000897421	0.0362767
GPR156	8.86114	-1.49816	0.451269	-3.31989	0.000900536	0.0363242
PTN	502.981	-1.44197	0.43488	-3.31579	0.00091385	0.036782
ABCC8	12.0823	2.18844	0.660224	3.31469	0.00091746	0.036848
CXCL10	760.615	1.25564	0.378894	3.31396	0.000919836	0.0368644
GRAP2	37.5515	1.05249	0.317749	3.31233	0.000925225	0.0369232
KLF2	293.43	0.798804	0.241161	3.31232	0.000925251	0.0369232
FABP3	194.383	-1.20454	0.363794	-3.31106	0.000929422	0.0369473
POU2F2	60.4185	1.0163	0.306951	3.31095	0.000929801	0.0369473
LOC654433	35.154	0.970772	0.293286	3.30999	0.000932994	0.0369956
AGFG2	492.325	0.545115	0.164861	3.30652	0.000944618	0.0372268
BAALC	74.1023	-1.543	0.466605	-3.30687	0.000943451	0.0372268
RASSF5	365.972	0.783888	0.237077	3.30647	0.000944793	0.0372268
TRIM32	556.337	-0.3457	0.104589	-3.30533	0.000948654	0.0373004
PRKCB	120.72	1.10076	0.333323	3.30238	0.000958685	0.0376158
DSCR8	28.6057	-3.32447	1.00781	-3.29869	0.000971363	0.0379541
KLB	24.13	-1.1531	0.349507	-3.29921	0.000969564	0.0379541
NOS2	23.6997	1.64694	0.499678	3.29601	0.000980687	0.0382386
L1CAM	198.031	1.66263	0.504712	3.29422	0.000986957	0.0384031
WFDC2	53811.4	-1.31058	0.397915	-3.29361	0.000989079	0.0384058
C15orf26	102.197	-2.03551	0.618863	-3.28911	0.00100504	0.0388642
C1QB	3551.36	1.19145	0.362238	3.28914	0.00100493	0.0388642
SLC39A2	23.3647	-1.67286	0.508748	-3.28819	0.00100832	0.0389108
SCML4	26.0738	1.21103	0.368455	3.28679	0.00101337	0.0390253
SLC47A2	46.9111	-1.95238	0.594485	-3.28415	0.00102291	0.0393117
IKZF1	233.016	0.959546	0.292292	3.28283	0.00102769	0.0393496
PIK3AP1	366.322	0.958434	0.291963	3.28272	0.0010281	0.0393496
LPO	17.8169	-1.85949	0.566717	-3.28115	0.00103384	0.0394883
NRTN	327.9	-1.35224	0.412233	-3.28029	0.001037	0.0395286
CCDC153	104.045	-1.26778	0.386661	-3.2788	0.00104249	0.0395764
DNAL4	991.678	-0.448462	0.136753	-3.27936	0.00104042	0.0395764
CDHR4	364.577	-2.28428	0.697399	-3.27542	0.00105504	0.0399059
FLRT1	72.499	-1.20087	0.366642	-3.27532	0.00105543	0.0399059
ANKK1	31.9178	-1.36926	0.418265	-3.27368	0.00106157	0.0400572
ACAP1	273.488	1.02049	0.311818	3.2727	0.00106524	0.0401147
GIMAP7	153.789	0.995696	0.304372	3.27132	0.00107048	0.0401864
PTPRF	13018.5	-0.624415	0.19089	-3.27106	0.00107144	0.0401864
C2orf77	352.595	-0.967826	0.296086	-3.26873	0.00108031	0.0403573
GRHL3	122.795	1.296	0.396449	3.26903	0.00107917	0.0403573
ARHGAP25	236.581	0.776288	0.237625	3.26687	0.00108745	0.0405432
PSMC2	1946.97	0.264855	0.0810911	3.26614	0.00109025	0.0405667
ZC3H10	263.116	-0.363955	0.11146	-3.26535	0.00109328	0.0405987
JPH3	10.8359	-1.40214	0.429528	-3.26437	0.00109708	0.0406592
TECPR2	1033.86	-0.577969	0.177223	-3.26126	0.0011092	0.0410272
S1PR5	28.2408	1.14233	0.351176	3.25286	0.00114249	0.0421752
C11orf66	253.238	-1.56855	0.482706	-3.24948	0.00115615	0.0423453
CD8B	178.592	1.21852	0.374846	3.25071	0.00115116	0.0423453
ITGB5	3776.11	-0.558725	0.171927	-3.24979	0.00115492	0.0423453
LRRC23	760.958	-1.02254	0.314586	-3.25044	0.00115225	0.0423453
PON1	5.16183	-2.40495	0.740505	-3.24772	0.00116333	0.042525
SYCE2	35.7038	0.889793	0.274256	3.24438	0.00117705	0.0429428
SLAMF1	37.515	1.14767	0.353982	3.24216	0.00118627	0.0431952
CAMK4	17.5525	1.27623	0.393851	3.24039	0.00119367	0.043275
CCRL2	53.4557	0.884446	0.272956	3.24025	0.00119427	0.043275
WAS	307.986	0.869959	0.268508	3.23997	0.00119541	0.043275
CXCR1	13.0122	-1.64442	0.508397	-3.23451	0.00121852	0.0440266
CSF3	146.905	-1.9716	0.609701	-3.23372	0.00122191	0.0440642
LOC96610	39426.6	1.56562	0.48446	3.23168	0.00123064	0.0442937
C10orf107	103.054	-1.60823	0.497867	-3.23025	0.00123682	0.0444003
PLEK	313.77	0.961607	0.297721	3.2299	0.00123835	0.0444003
CPNE4	35.9096	-2.33992	0.725175	-3.22669	0.0012523	0.044559
HSD11B1	42.9614	1.36019	0.421497	3.22704	0.0012508	0.044559
SULF2	2792.99	-1.01694	0.315021	-3.22816	0.00124591	0.044559
UNC93A	54.4129	-1.65951	0.51425	-3.22705	0.00125072	0.044559
CST6	90.0291	-1.37835	0.427294	-3.22576	0.00125639	0.0446052
RSPH1	919.367	-1.34206	0.416103	-3.22531	0.00125836	0.0446052
BRSK2	46.9919	-1.79455	0.556794	-3.223	0.00126857	0.0446356
SERPINA5	3741.59	-1.76469	0.54753	-3.223	0.00126855	0.0446356
SLC22A16	29.6064	-1.85999	0.577106	-3.22295	0.00126876	0.0446356
TMEM101	2591.39	-1.28687	0.399264	-3.22311	0.00126809	0.0446356
FCGBP	4165.95	-1.32492	0.411515	-3.21962	0.0012836	0.045073
APLN	240.624	1.12568	0.349822	3.21787	0.00129148	0.0452648
ZBTB22	630.897	-0.383886	0.11933	-3.21703	0.00129527	0.0453125
C20orf114	87.7419	-2.33853	0.727116	-3.21617	0.00129914	0.0453479
SRD5A2	65.4894	-1.81791	0.565317	-3.21573	0.00130112	0.0453479
WFS1	3955.88	-0.825891	0.256965	-3.21402	0.00130891	0.0455344
KCNK15	255.635	-1.35564	0.422121	-3.21149	0.00132046	0.0456245
LRRC50	314.518	-1.72253	0.536337	-3.21166	0.00131971	0.0456245
TMEM146	29.5075	-2.39832	0.74675	-3.21167	0.00131965	0.0456245
VWA5B2	382.852	-1.87072	0.58254	-3.21132	0.00132125	0.0456245
C9orf70	9.36862	-1.50362	0.468628	-3.20857	0.00133399	0.0458108
HSD17B14	208.611	1.00539	0.313297	3.20906	0.00133168	0.0458108
LTBP3	3723.14	-0.7101	0.221284	-3.209	0.00133199	0.0458108
SERPINA6	209.488	-2.16571	0.675219	-3.20742	0.0013393	0.045909
SNTN	288.003	-2.55263	0.796033	-3.20669	0.00134274	0.0459428
TCF15	29.7564	-1.38458	0.432106	-3.20427	0.00135405	0.0462454
ANKRD6	253.918	-0.692381	0.216253	-3.20172	0.00136612	0.0465725
BTLA	20.7845	1.16006	0.362429	3.2008	0.00137049	0.0465736
F10	50.6522	-1.10099	0.343988	-3.20066	0.00137113	0.0465736
HLA-DQA1	2025.89	1.141	0.356703	3.19875	0.00138025	0.0467849
KCNE1	165.537	-1.8182	0.568579	-3.19779	0.00138485	0.0467849
LRRC43	104.828	-1.25119	0.391264	-3.19781	0.00138476	0.0467849
LRRC48	342.727	-1.28894	0.40327	-3.19621	0.00139244	0.0469565
ZBTB32	14.2559	1.15891	0.362699	3.19523	0.00139722	0.0470329
GPR18	21.1785	1.02747	0.321676	3.19412	0.00140256	0.0471279
SLC22A4	90.1831	-1.10725	0.346786	-3.19288	0.00140859	0.0472459
DNAH6	199.168	-1.40621	0.440578	-3.19175	0.00141415	0.0472628
SPATA18	724.265	-1.0973	0.343781	-3.19186	0.00141358	0.0472628
WNT2B	24.1445	-1.13469	0.355622	-3.19073	0.00141913	0.0473449
NLRC4	31.5234	0.682812	0.214067	3.18971	0.00142415	0.0474278
FAM92B	177.113	-2.11176	0.662411	-3.18799	0.00143265	0.0474573
TM9SF1	2632.38	-0.290491	0.0911076	-3.18843	0.00143046	0.0474573
TNFRSF9	23.1622	1.06145	0.332929	3.18821	0.00143157	0.0474573
APOA1	29.5938	-1.49935	0.470513	-3.18664	0.00143938	0.0475443
STOML3	96.0686	-2.35347	0.738589	-3.18644	0.00144035	0.0475443
CCDC135	243.366	-1.81728	0.571039	-3.18241	0.00146054	0.0479965
DZIP1L	119.515	-1.24609	0.391467	-3.18313	0.00145691	0.0479965
ODAM	35.1053	-2.05092	0.644504	-3.18217	0.00146174	0.0479965
TTLL9	87.4096	-1.41376	0.444445	-3.18095	0.00146793	0.0481153
BDNF	66.4171	1.32342	0.416284	3.17913	0.00147716	0.0481488
EPHX3	44.8539	-1.46544	0.460875	-3.17969	0.0014743	0.0481488
SNORA53	3.3797	1.21616	0.382594	3.17872	0.00147924	0.0481488
TMC8	380.051	0.863225	0.271507	3.17938	0.00147589	0.0481488
SIRPD	0.582356	1.93118	0.607674	3.17799	0.00148301	0.0481876
WISP3	18.1919	-2.29753	0.723198	-3.1769	0.00148858	0.0482846
C1RL	1463.91	-0.528784	0.166535	-3.17521	0.00149729	0.0484832
VSIG4	275.816	1.05776	0.333242	3.17414	0.00150279	0.0485772
LOC285548	3.92241	-2.05807	0.648755	-3.17233	0.00151222	0.0487977
ITLN2	9.46333	-2.38297	0.751441	-3.1712	0.00151813	0.0489042
MAGED4	632.72	-1.20116	0.379051	-3.16885	0.00153042	0.0492152
CCDC114	551.399	-1.4045	0.443372	-3.16777	0.00153615	0.049315
FNDC3B	2956.87	-0.478827	0.151365	-3.1634	0.00155937	0.0498893
KCNK3	61.1312	-1.42045	0.449011	-3.16352	0.00155874	0.0498893
